# Supplementary material for: P value and Bayesian analysis in randomized-controlled trials in child health research published over 10 years, 2007 to 2017: a methodological review protocol
Source: Springer Nature journal article supplement (doi:10.1186/s13643-021-01622-8), 2021-03-10
Supplement: MOESM2 [file 18951654]

## Appendix A. Search strategy

Database: Cochrane Central Register of Controlled Trials (Wiley)

#1- (Infant\* or infancy or Newborn\* or Baby\* or Babies or Neonat\* or Preterm\* or Prematur\* or Postmatur\* or Child\* or Schoolchild\* or School age\* or Preschool\* or Kid or kids or Toddler\* or Teen\* or Boy\* or Girl\* or Minors\* or Pubert\* or Pubescen\* or Prepubescen\* or Pediatric\* or Paediatric\* or Padiatric\* or Nursery school\* or Kindergar\* or Primary school\* or Secondary school\* or Elementary school\* or High school\* or Highschool\*):ti,ab,kw

#2- (Adolesc\*):ti,ab

#3- (Infant or Child or Minors or Puberty or Pediatrics or Schools):kw

#4- #1 or #2 or #3

#5 adolescent\*:kw

#6- (adolescent\* and (adult\* or elderly or "middle aged" or "aged, 80 and over")):kw

#7- #6 and not #4

#8- #4 or #5

#9- #8 and not #7 from 2017 to 2017, in Trials

\*\*\*\*\*
